# Supplementary material for: The Dominant Folding Route Minimizes Backbone Distortion in SH3
Source: PLOS journal article supplement (doi:10.1371/journal.pcbi.1002776), 2012-11-15
Supplement: S3 (10.1371/journal.pcbi.1002776.s003) [file journal.pcbi.1002776.s003]

301 Moved Permanently

# Moved Permanently

The document has moved here.

---

Apache Server at www.ploscompbiol.org Port 80
