# Supplementary material for: The Dominant Folding Route Minimizes Backbone Distortion in SH3
Source: PLoS Comput Biol. 2012 Nov 15;8(11):e1002776. doi: 10.1371/journal.pcbi.1002776 (PMC3499259; doi:10.1371/journal.pcbi.1002776)
Supplement: Text S1 — Determination of the overall bias along in and . Additional technical information about the fitting procedure used to determine , defined in Eqn. 6. (PDF) [file pcbi.1002776.s003.pdf]

## Supplementary Text S1 for the article:

### The Dominant Folding Route Minimizes Backbone Distortion in SH3

by H. Lammert, J. K. Noel and J. N. Onuchic

We study the free energy landscape  $\Delta F(Q, Q_{\text{path}})$  determined from our simulations and the underlying energy and entropy contributions  $\Delta U(Q, Q_{\text{path}})$  and  $T\Delta S(Q, Q_{\text{path}})$ . The full contributions  $\Delta U(Q, Q_{\text{path}})$  and  $+T\Delta S(Q, Q_{\text{path}})$  are plotted in Fig. S1. Both plots are dominated by the gradient along the reaction coordinate  $Q$ , which describes the overall progress of the folding reaction. Any structure in the direction of  $Q_{\text{path}}$ , which describes the folding mechanism, is obscured. In order to reveal the superimposed structure that is shaping the folding mechanism we remove the global gradients along  $Q$ . In Eqn. 6 we define a function  $f(Q)$  that contains the common portion of  $\Delta U$  and  $T\Delta S$  that is canceled in their subtraction to form  $\Delta F$ . The complete information about the mechanism is contained in the residuals  $\delta U(Q, Q_{\text{path}}) = \Delta U(Q, Q_{\text{path}}) - f(Q)$  and  $T\delta S(Q, Q_{\text{path}}) = T\Delta S(Q, Q_{\text{path}}) - f(Q)$ .  $f(Q)$  is obtained from a fit to  $\Delta U$  and  $T\Delta S$ .

Although the dominant contribution to the potential is contact energy, and  $Q$  is simply the number of formed contacts, the observed  $Q$ -dependence of the energy is not linear. The energy and entropy terms possess enough curvature to necessitate the use of a quadratic function  $f(Q) = a_2 Q^2 + a_1 Q + a_0$ .

In order to obtain a fair estimate of the common component of energy and entropy we fit  $f(Q)$  to both  $\Delta U$  and  $T\Delta S$  together. For a least-squares fit this is equivalent to fitting to the average of both terms,  $(1/2)[\Delta U + T\Delta S]$ .

All points on both the surfaces  $\Delta U(Q, Q_{\text{path}})$  and  $T\Delta S(Q, Q_{\text{path}})$  enter equally into the fit. This is different from a fit to the one-dimensional functions  $\Delta U_{1D}(Q)$  and  $T\Delta S_{1D}(Q)$  that could be obtained as components of the one-dimensional free energy profile  $\Delta F_{1D}(Q)$ , where points at different  $Q_{\text{path}}$  enter with different thermodynamic weights. Instead it corresponds to a fit to the direct averages along  $Q_{\text{path}}$ , which give a better description of the overall shape of the two-dimensional surfaces, i.e.  $\overline{\Delta U(Q)} = (1/N) \sum_{i=1}^N \Delta U(Q, Q_{\text{path},i})$  for the energy.

The one-dimensional functions  $\overline{\Delta U(Q)}$  and  $\overline{T\Delta S(Q)}$  for the original, unperturbed model are shown in Fig. S2 together with their average and with the fitted quadratic function  $f(Q)$ .
